# Supplementary material for: Strong homeostatic TCR signals induce formation of self‐tolerant virtual memory CD8 T cells
Source: PubMed Central journal article supplement (PMC6043851; doi:10.15252/embj.201798518), 2018-05-11
Supplement: EMBJ-37-e98518-s001.pdf [file EMBJ-37-e98518-s001.pdf]

## Expanded View Figures

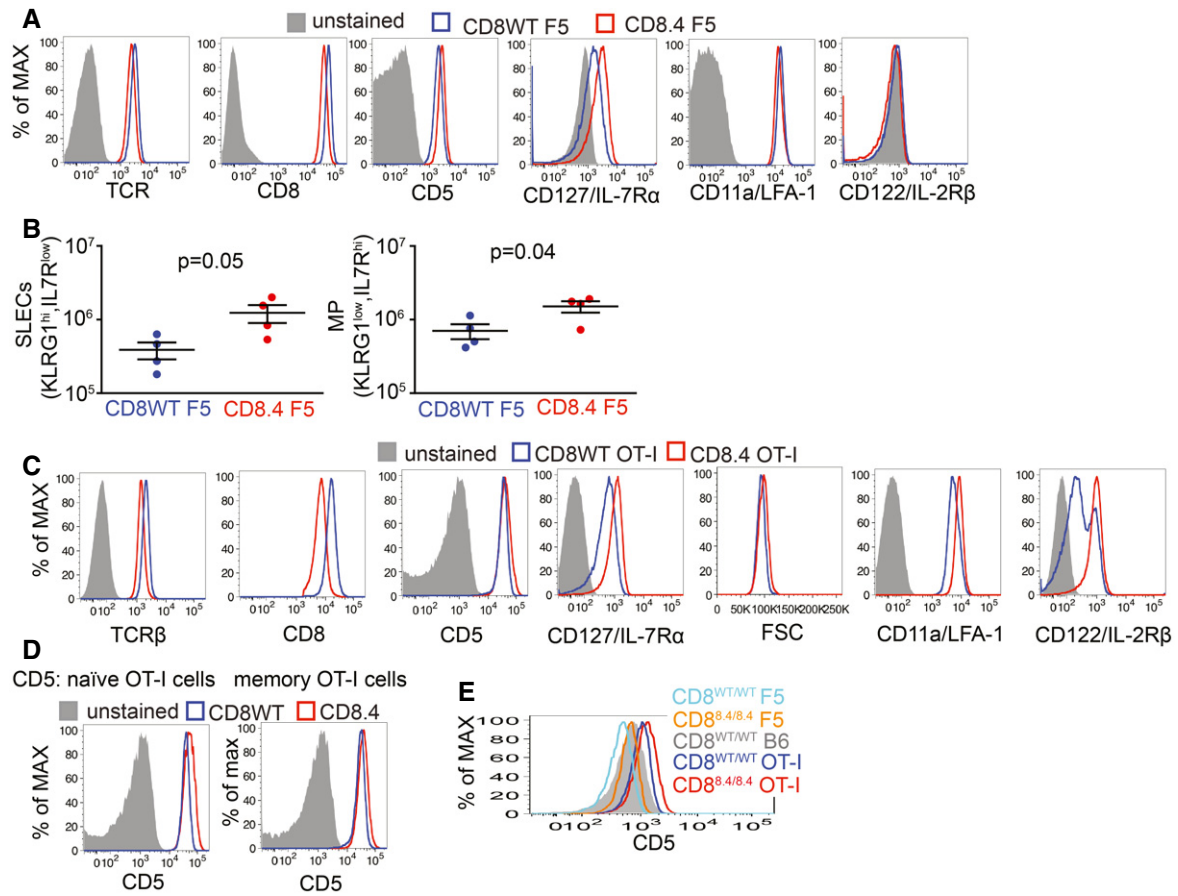

**Figure EV1. Analysis of CD8WT and CD8.4 monoclonal T cells, related to Fig 1.**

- A Expression of indicated surface markers on CD8WT F5 and CD8.4 F5 LN T cell was analyzed by flow cytometry. A representative experiment out of four in total.
- B CD8WT F5 and CD8.4 F5 T cells primed by Lm-NP68 (Fig 1D) were examined by flow cytometry. Absolute numbers of KLRG1<sup>+</sup> IL-7R<sup>-</sup> short-lived effector cells and KLRG1<sup>-</sup> IL-7R<sup>+</sup> memory precursors were determined. Mean  $\pm$  SEM.  $n = 4$  mice per group from two independent experiments. Statistical significance was determined by two-tailed  $t$ -test. The data do not seem to be strongly deviated from the normal distribution and seem to have equal variance. However, because of the low  $n$ , we could not test the normality/equal variance rigorously.
- C Expression of indicated markers on CD8WT OT-I and CD8.4 OT-I LN T cell and their size estimated by FSC signal was analyzed by flow cytometry. A representative experiment out of 10 in total.
- D Expression of CD5 on CD44<sup>-</sup> (naïve) and CD44<sup>+</sup> (memory subsets) of CD8WT OT-I and CD8.4 OT-I LN T cells was analyzed by flow cytometry. A representative experiment out of three in total.
- E Expression of CD5 on T cells isolated from LN of indicated mouse strains by flow cytometry. A representative experiment out of two in total.

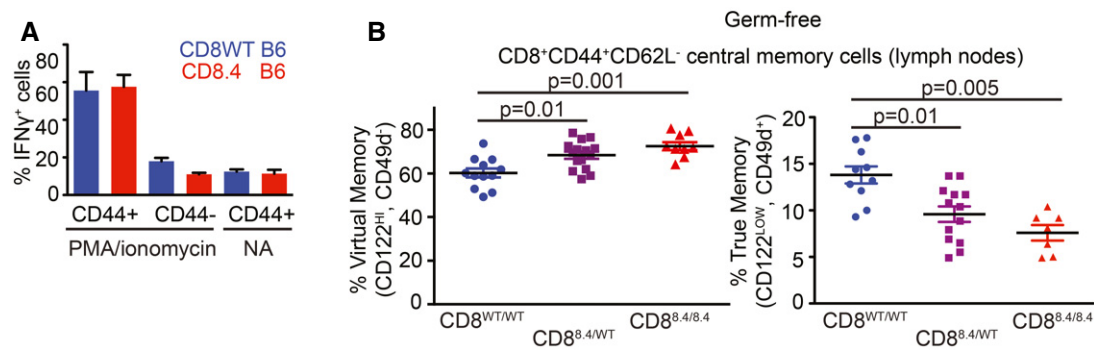

**Figure EV2. Analysis of CD8WT and CD8.4 polyclonal T cells, related to Fig 2.**

A LN cells isolated from polyclonal CD8WT and CD8.4 mice were stimulated with 10 ng/ml PMA and 1.5  $\mu$ M ionomycin or left untreated for 5 h in the presence of BD Golgi Stop and the percentage of IFN $\gamma$ -producing cells was determined by flow cytometry. The cells were gated as CD8<sup>+</sup> and further divided into CD44<sup>+</sup> and CD44<sup>-</sup> populations. Mean  $\pm$  SEM,  $n = 4$  independent experiments.

B Quantification of the frequency of CD122<sup>HI</sup> CD49d<sup>-</sup> VM and CD122<sup>LOW</sup> CD49d<sup>+</sup> true memory cells among CD8<sup>+</sup> CD44<sup>+</sup> CD62L<sup>+</sup> CM T cells isolated from LN is shown. Mean,  $n = 9$ –15 mice per group from four independent experiments. Statistical significance was determined using two-tailed Mann–Whitney test.

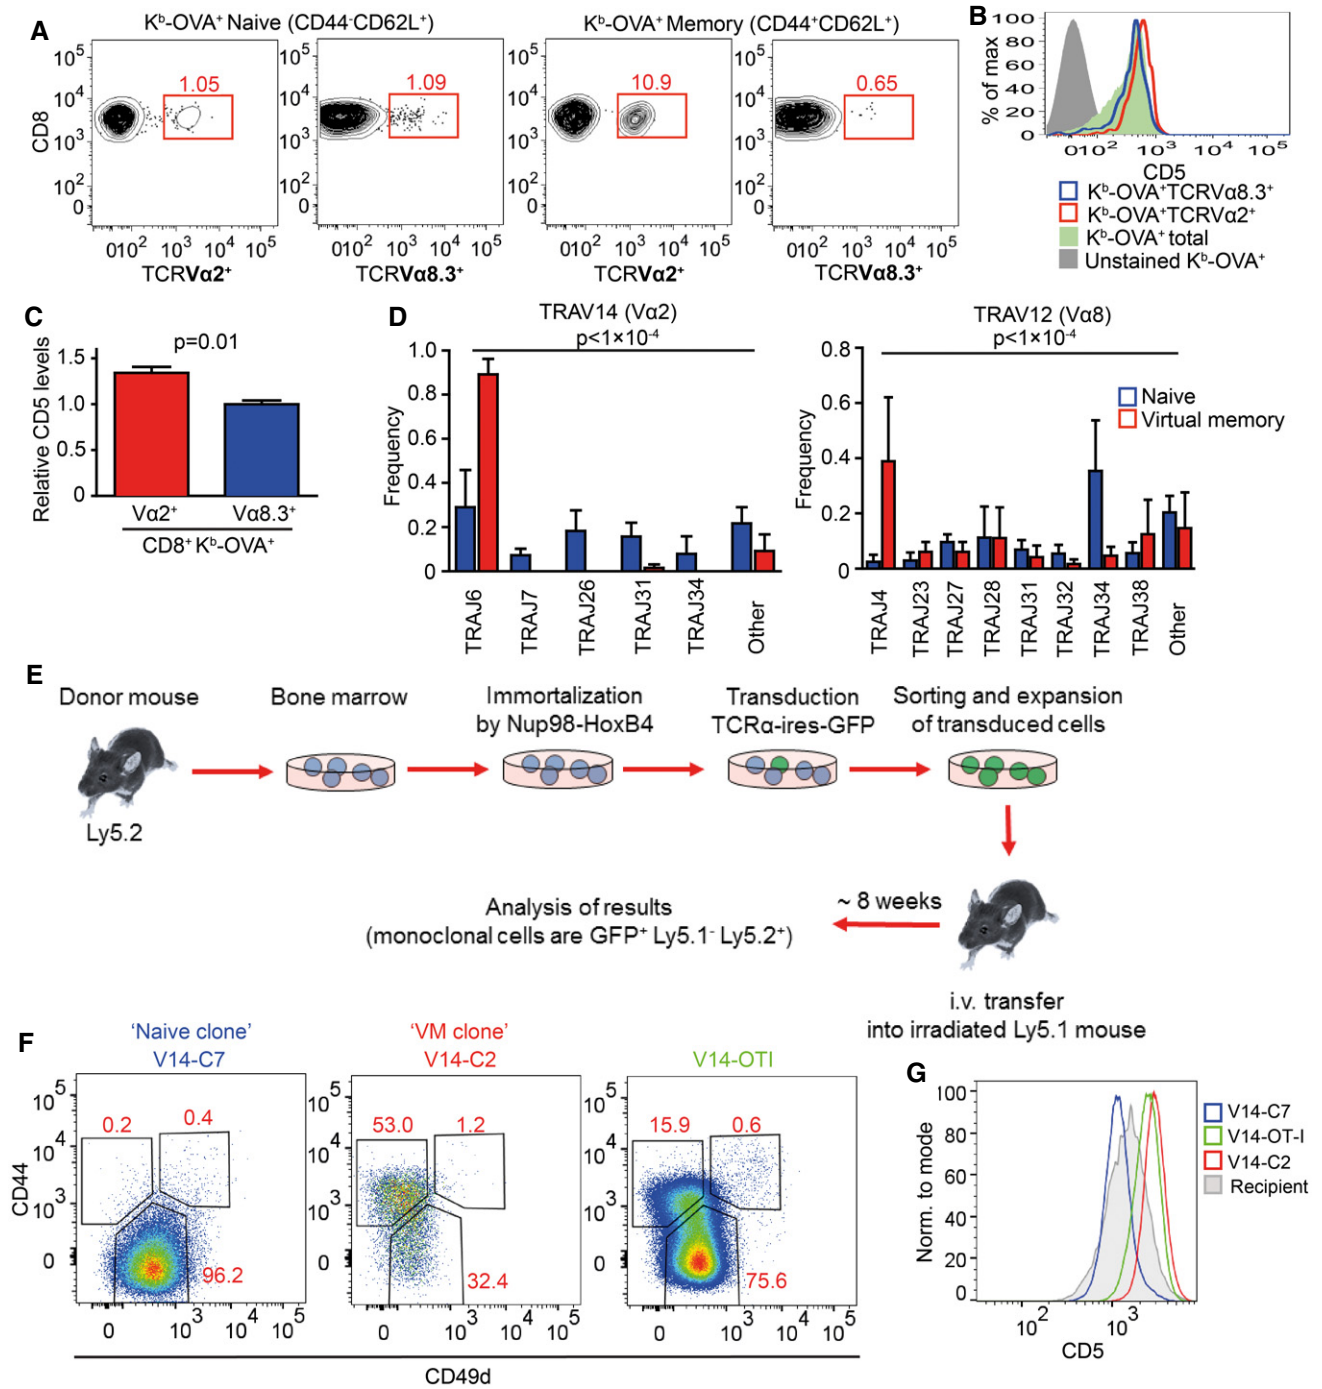

**Figure EV3. Differences in TCR repertoires between naïve and VM T cells, related to Fig 3.**

- A Alternative gating strategy for the same samples as shown in Fig 3B–D (T cells from Vβ5 mice). A representative experiment out of eight in total.
- B, C The expression of CD5 on CD8<sup>+</sup> K<sup>b</sup>-OVA-4mer<sup>+</sup> CD8<sup>+</sup> Vα2<sup>+</sup> or Vα8.3<sup>+</sup> cells or total CD8<sup>+</sup> K<sup>b</sup>-OVA-4mer<sup>+</sup> isolated from LN and the spleen was determined by flow cytometry. Relative MFI CD5 levels were quantified (CD5 levels on CD8<sup>+</sup> K<sup>b</sup>-OVA-4mer<sup>+</sup> Vα8.3<sup>+</sup> were arbitrarily set as 1). Mean + SD, n = 3 independent experiments. Statistical significance was determined using two-tailed one-value t-test.
- D TCRα sequences from Fig 3F were analyzed for TRAJ usage. Means + SEM. n = 4 independent experiments. Statistical significance was determined by chi-square test.
- E Schematic representation of the generation and analysis of retrogenic monoclonal T-cell subsets.
- F Frequency of VM T cells among monoclonal populations expressing TCR clones V14-C2, V14-C7, and OT-I generated as in Fig 3G.
- G CD5 levels on naïve monoclonal T cells expressing V14-C2, V14-C7, and OT-I. Representative mice out of 9–14 in total from two to four independent experiments.

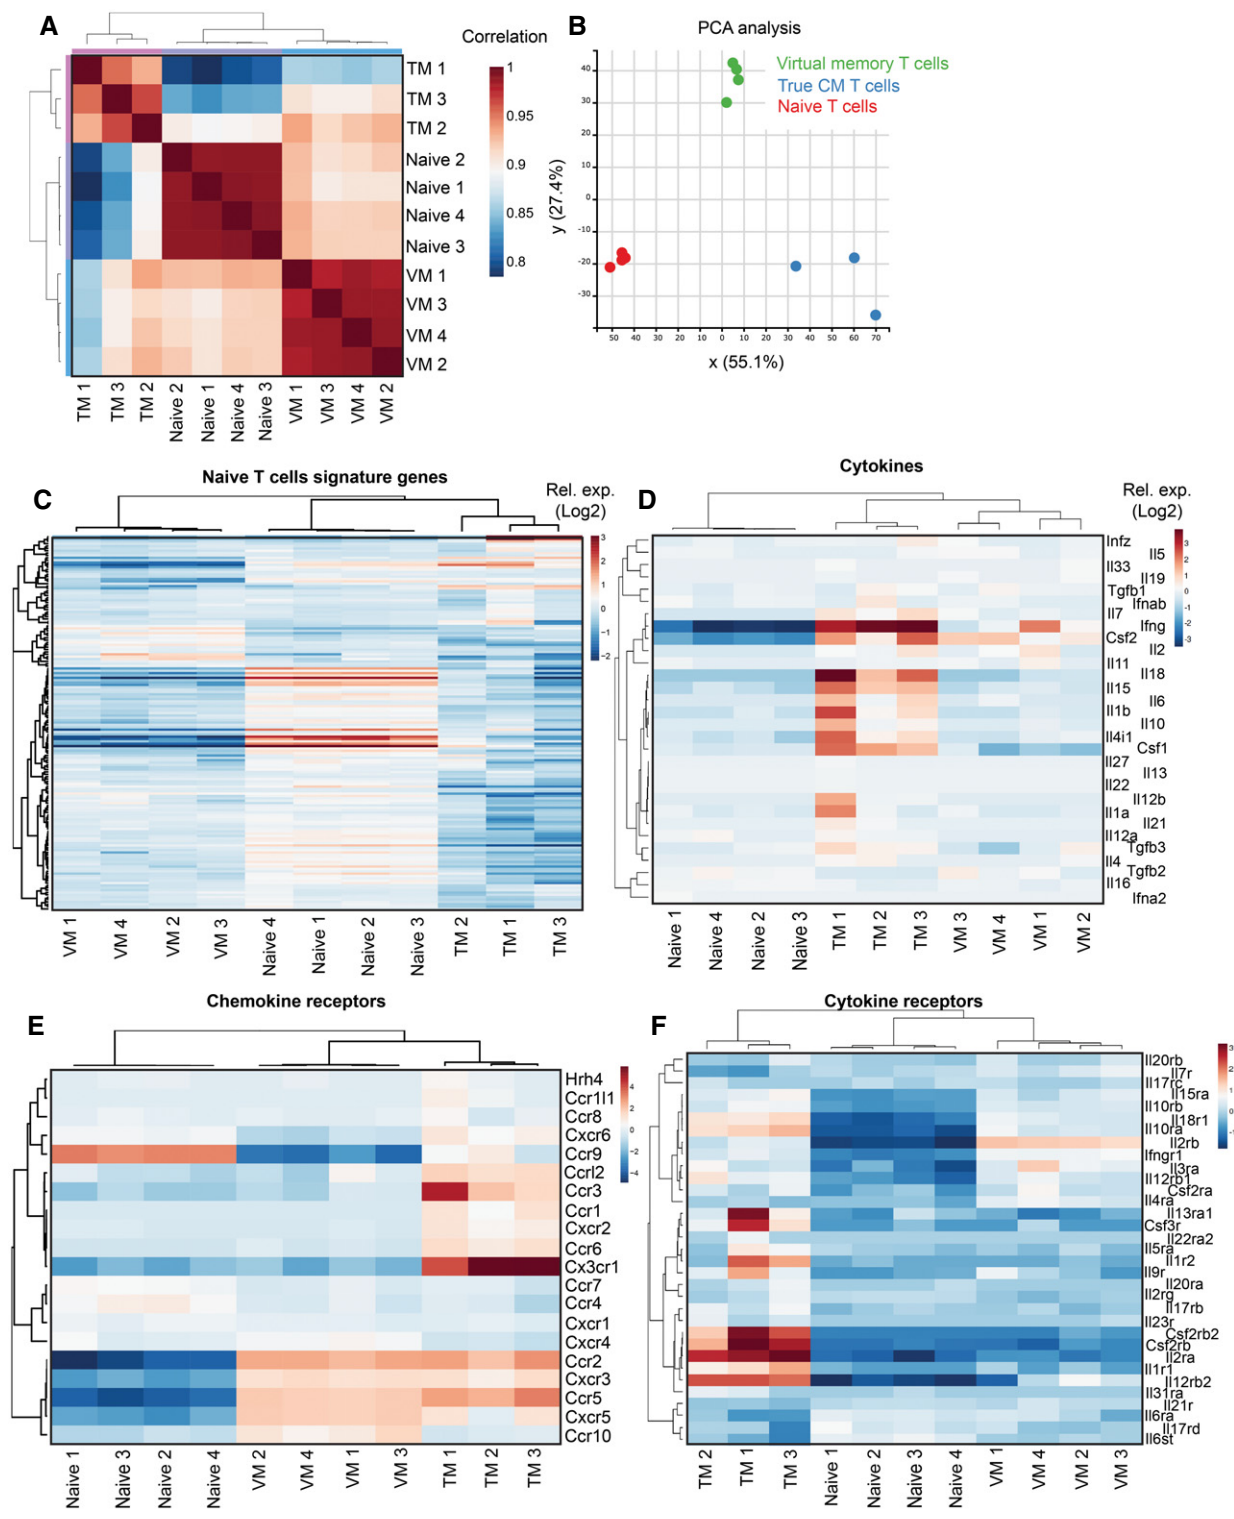

**Figure EV4. Gene expression analysis of naive, VM, and TM T cells, related to Fig 4.**

Transcriptomes of naive ( $n = 4$ ), VM ( $n = 4$ ), and TM ( $n = 3$ ) CD8<sup>+</sup> T cells were analyzed by deep RNA sequencing.

A Correlation of the gene expression between individual samples.

B PCA analysis between the samples.

C–F Enrichment of CD8<sup>+</sup> naive signature genes (as revealed by previous studies) (C), cytokine encoding genes (D), chemokine receptor encoding genes (E), and cytokine receptor encoding genes (F) in naive, VM, and true CM T cells.

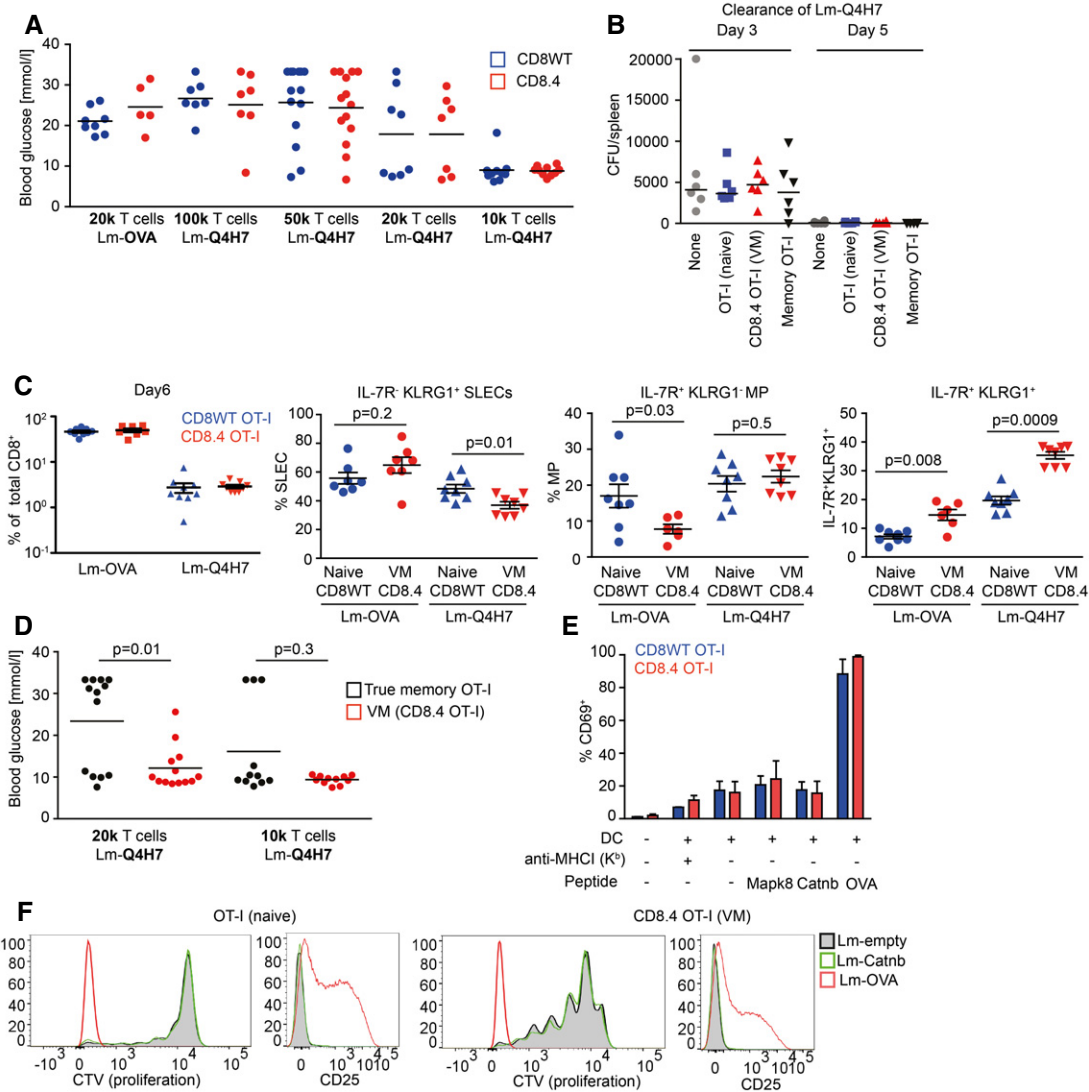

**Figure EV5. Functional characterization of naïve, VM, and TM T cells, related to Fig 5.**

**A** Indicated number of CD8WT OT-I or CD8.4 OT-I T cells were adoptively transferred into RIP-OVA hosts, which were infected with Lm-OVA or -Q4H7 1 day later. Blood glucose was measured 7 days after the infection.  $n = 5-11$  mice per group in 3-6 independent experiments. These are the same experiments as in Fig 5A. Mean is indicated.

**B** FACS-sorted  $1 \times 10^4$  naïve CD8WT OT-I, CD8.4 OT-I (VM), sorted true memory OT-I T cells or no T cells were adoptively transferred into Ly5.1 C57Bl/6 mice followed by infection with 5,000 CFU Lm-Q4H7. Total Lm-Q4H7 CFU counts in the spleen were quantified on day 3 and day 5 post-infection.  $n = 6$  mice in two independent experiments.

**C** Quantification of the experiment shown in Fig 5E and F. Percentage of donor OT-I and CD8.4 OT-I T cells among all CD8<sup>+</sup> T cells is shown. Percentage of short-lived effector cells (IL-7R<sup>-</sup> KLRG1<sup>+</sup>), memory precursors (IL-7R<sup>+</sup> KLRG1<sup>-</sup>), and double-positive cells IL-7R<sup>+</sup> KLRG1<sup>+</sup> among the donor cells are shown. Statistical significance was calculated using Mann-Whitney test.  $n = 7$  (CD8.4 OT-I + Lm-OVA) or 9 (the other three experimental conditions) in four independent experiments.

**D** Indicated number of CD8.4 OT-I or true memory OT-I T cells were adoptively transferred into RIP-OVA hosts, which were infected with Lm-Q4H7 1 day later. The glucose in the blood was measured on day 7 post-infection. Statistical significance was calculated using Mann-Whitney test  $n = 11$  ( $1 \times 10^4$  transferred cells) or 13 ( $2 \times 10^4$  transferred cells) mice per group in four independent experiments. These are the same experiments as in Fig 5H.

**E** OT-I or CD8.4 OT-I was cocultured with bone marrow dendritic cells that were pre-loaded or not with 10  $\mu$ M putative endogenous positive selecting peptides for OT-I T cells (Mapk8, AGYSFEKL; Cantb, RTTYEKL) or with 0.1  $\mu$ M OVA peptide. Blocking of the MHC-I by adding anti-H2-K<sup>b</sup> antibody (clone Y3, 10  $\mu$ g/ml) was used as a negative control. Percentage of CD69<sup>+</sup> T cells in the overnight stimulation was quantified by flow cytometry. Mean + SEM.  $n = 2$  (MHC-I blocking) or 3 (all the other experimental conditions) independent experiments.

**F** CellTrace violet-loaded OT-I or CD8.4 OT-I T cells were adoptively transferred into Ly5.1 C57Bl/6 donors followed by infection with Lm-OVA ( $1 \times 10^4$  transferred cells), Lm-Catnb, or empty Lm (both  $1 \times 10^5$  transferred cells) 1 day later. Expression of activation marker CD25 and dilution of the proliferation dye in donor cells was examined on day 5 post-infection. Representative mice out of seven in total from three independent experiments are shown. The cells from the Lm-OVA infected mice are the same as used for the analysis in Fig 5G.
